# Supplementary material
Source: Research Square preprint supplement (doi:10.21203/rs.3.rs-8388907/v1)
Supplement: Supplementary file 1 [file 538814ad1b184b6aaebe7861.docx]

**Table 1.** Characteristics of the study group, demographic, clinical and laboratory data.

| Variable | Study group [n=76] |
| --- | --- |
| Gender  Female  Male | 39 (51.3%)  37 (48.7%) |
| Age [years] Me (Min-Max)  <65  ≥65 | 66 (37.0-84.0)  33 (43.4%)  43 (56.6%) |
| ISS Stage  1  2  3 | 23 (30.2%)  17 (22.4%)  36 (47.4%) |
| R-ISS Stage  1  2  3  *No data: n=21* | 11 (20%)  34 (66.8%)  10 (13.2%) |
| Type of monoclonal protein  IgG  IgA  Free light chains only | 44 (57.9%)  25 (32.9%)  7 (9.2%) |
| Plasmocytes in bone marrow [%] Me (Min-Max) | 25.0 (10.0-90.0) |
| Monoclonal/polyclonal FLC ratio Me (Min-Max)  <74  >74 | 74 (1.1-6877.7)  39 (51.3%)  37(48.7%) |
| β2-microglobulin [>3.5 mg/l]  Low  High | 25 (32.9%)  51 (67.1%) |
| LDH [>480 U/l]  Low  High | 65 (85.5%)  11 (14.5%) |
| Creatinine [>2 mg/dl]  Low  High | 67 (88.2%)  9 (11.8%) |
| Albumin [<3.5 g/dl]  Low  High | 28 (36.8%)  48 (63.2%) |
| Calcium [>2.6 mmol/l]  Low  High | 51 (67.1%)  25 (32.9%) |
| Hgb [<10 g/dl]  Low  High | 28 (36.8%)  48 (63.2%) |
| Response to first line of treatment  NR or PD or PR  sCR or CR or VGPR | 41 (54.0%)  35 (46.0%) |
| Treatment schedule  CTD  Other (MPV, PAD, VCD, VTD) | 36 (47.4%)  40 (52.6%) |
| Auto-HSCT  Yes  No | 21 (27.6%)  55 (72.4%) |
| High risk cytogeneticsa  No  Yes  *No data: n=21* | 37 (67.3%)  18 (32.7%) |
| Bone changes on X-ray  None  Limited  Multiple | 20 (26.3%)  21 (27.6%)  35 (46.1%) |

adel17p, t(4;14) or t(14;16)

Abbreviations: auto-HSCT, autologous hematopoietic stem cell transplantation; CR, complete response; CTD, cyclophosphamide, thalidomide, dexamethasone; FLC, free light chains; Hgb, hemoglobin; ISS, International Staging System; LDH, lactate dehydrogenase; Me, median; MPV, melphalan, prednisone, bortezomib; NR, not reached; PAD, bortezomib, doxorubicin, dexamethasone; PD, progressive disease; PR, partial response; R-ISS, Revised International Staging System; sCR, stringent complete response; VCD, bortezomib, cyclophosphamide, dexamethasone; VGPR, very good partial response; VTD, bortezomib, thalidomide, dexamethasone.

**Table 2.** Comparison of the bone metabolism regulatory biomarkers concentration depending on the number of bone lesions and the correlations between these variables.

| Variable | Comparisons depending on the number of bone lesions | | | *P*  *(Post hoc)* | *Correlations with number of lesions* |
| --- | --- | --- | --- | --- | --- |
| Me [IQR] (min-max) | | |
| None (0) | Limited (1) | Multiple (2) | rho  *p* |
| Activin A [pg/ml] | 450.75  [352.60-601.15]  (318.1-786.9) | 449.90  [365.00-530.57]  (293.3-1047.8) | 554.30  [436.42-717.70]  (306.6-2614.4) | 0.0239b  (2 vs 0 or 1) | 0.276  0.0158b |
| Dkk-1 [pg/ml] | 1893.25  [1578.85-2858.20]  (1460.9-4849.3) | 2805.80  [2026.37-3748.90]  (1286.3-13197.8) | 4325.30  [2984.85-11973.07]  (1845.2-26122.4) | <0.0001b  (2 vs 1, 2 vs 0, 1 vs 0) | 0.598  <0.0001b |
| GDF-15 [pg/ml] | 1415.30  [699.60-1768.30]  (560.8-3134.4) | 1034.30  [840.92-2578.75]  (264.2-6185.9) | 2784.20  [1587.42-5545.70]  (313.2-7908.6) | <0.0001b  (2 vs 0 or 1) | 0.489  <0.0001b |
| β-CTX [ng/ml] | 0.46  [0.34-0.75]  (0.2-1.4) | 0.46  [0.29-0.71]  (0.1-1.1) | 0.89  [0.55-1.62]  (0.2-5) | 0.001b  (2 vs 0 or 1) | 0.381  0.0007b |
| Sclerostin [ng/ml] | 0.68  [0.60-0.75]  (0.4-1.4) | 0.56  [0.45-0.79]  (0.4-1.1) | 0.63  [0.47-1.03]  (0.3-2.1) | 0.6089 | 0.010  0.9457 |

b- statistically significant result

Abbreviations: β-CTX, β-C-terminal telopeptid;, Dkk-1, dickkopf-related protein 1; GDF-15, growth differentiation factor 15; IQR, interquartile range; Me, median

**Table 3.** The impact of demographic, clinical and laboratory variables on progression-free survival and overall survival in the study group.

| Variablec | Progression-free survival | | | | | Overall survival | | | | |
| --- | --- | --- | --- | --- | --- | --- | --- | --- | --- | --- |
| Univariable analysis | | | Multivariable analysis | | Univariable analysis | | | Multivariable analysis | |
| Me (mo) | HR (95%CI) | *p* | HR (95%CI) | *p* | Me (mo) | HR  (95%CI) | *p* | HR (95%CI) | *p* |
| Gender  Female  Male | 19  17 | 0.76  [0.46-1.26] | 0.2775 | 0.66  [0.33-1.33] | 0.6666 | 66  28 | 0.61  [0.33-1.23] | 0.1017 | 0.54  [0.22-1.33] | 0.1870 |
| Age [years]  <65  ≥65 | 24  15 | 2.00  [1.21-3.30] | 0.0040b | 0.99  [0.45-2.13] | 0.9804 | 66  28 | 1.55  [0.85-2.83] | 0.1476 | 1.16  [0.46-2.93] | 0.7504 |
| Stage  ISS 1  ISS 2 and 3 | 40  16 | 2.93  [1.54-5.58] | 0.0011b | 1.77  [0.33-9.38] | 0.5073 | NR  25 | 4.37  [1.84-10.41] | 0.0009b | 7.81  [0.83-73.65] | 0.0739 |
| Monoclonal/ polyclonal FLC ratio  <74  >74 | 19  16 | 1.39  [0.84-2.29] | 0.1746 | 0.65  [0.27-1.56] | 0.3425 | NR  27 | 2.09  [1.14-3.83] | 0.0130b | 1.00  [1.00-1.00] | 0.0616 |
| β2-M  [>3.5 mg/l]  Low  High | 26  15 | 2.24  [1.35-3.70] | 0.0027b | 0.39  [0.12-1.26] | 0.1214 | NR  26 | 3.09  [1.68-5.67] | 0.0018b | 0.58  [0.09-3.49] | 0.5571 |
| LDH  [>480 U/l]  Low  High | 18  19 | 1.27  [0.62-2.59] | 0.4466 | 1.00  [0.99-1.01] | 0.5792 | 45  21 | 2.07  [0.84-5.08] | 0.0341b | 4.92  [1.39-17.40] | 0.0137b |
| Creatinine  [>2 mg/dl]  Low  High | 19  3 | 1.54  [0.67-3.55] | 0.2088 | 1.17  [0.45-3.03] | 0.7460 | 44  21 | 1.68  [0.63-4.50] | 0.1896 | 1.15  [0.39-3.38] | 0.7964 |
| Albumin  [<3.5 g/dl]  Low  High | 16  21 | 1.12  [0.68-1.85] | 0.6308 | 0.91  [0.32-2.61] | 0.9187 | 17  NR | 3.97  [1.97-7.99] | <0.0001b | 4.31  [1.40-13.23] | 0.0111b |
| Calcium  [>2.6 mmol/l]  Low  High | 21  13 | 2.02  [1.12-3.62] | 0.0040b | 1.29  [0.60-2.75] | 0.5067 | 66  24 | 2.44  [1.24-4.83] | 0.0019b | 0.83  [0.30-2.30] | 0.7343 |
| Hgb  [<10g/dl]  Low  High | 13  21 | 1.62  [0.94-2.80] | 0.0502 | 1.86  [0.75-4.63] | 0.1796 | 21  66 | 2.24  [1.16-4.31] | 0.0050b | 1.77  [0.51-6.12] | 0.3674 |
| β-CTX  [>0.61 ng/ml]  Low  High | 19  17 | 1.27  [0.77-2.09] | 0.3295 | 0.56  [0.23-1.39] | 0.2203 | 66  32 | 1.61  [0.89-2.94] | 0.1101 | 0.99  [0.26-3.66] | 0.9932 |
| Activin A [>483 pg/ml]  Low  High | 21  16 | 1.12  [0.68-1.85] | 0.6308 | 0.73  [0.33-1.62] | 0.4460 | 43  35 | 1.00  [0.55-1.82] | 0.9949 | 0.60  [0.19-1.85] | 0.3810 |
| Dkk-1  [>2954 pg/ml] Low  High | 26  13 | 1.94  [1.16-3.25] | 0.0051b | 1.75  [1.03-2.98] | 0.0418b | NR  21 | 3.58  [1.94-6.61] | <0.0001b | 3.04  [1.53-6.06] | 0.0016b |
| GDF-15  [>1712 pg/ml] Low  High | 21  13 | 1.81  [1.09-2.98] | 0.0162b | 1.94  [0.82-4.57] | 0.1282 | NR  21 | 2.61  [1.43-4.78] | 0.0016b | 0.95  [0.29-3.07] | 0.9343 |
| Sclerostin [>0.64 ng/ml]  Low  High | 19  19 | 0.91  [0.49-1.69] | 0.7660 | 0.94  [0.33-2.65] | 0.9189 | 45  43 | 0.88  [0.42-1.86] | 0.7400 | 0.62  [0.18-2.11] | 0.4555 |
| Response  to first line of treatment  NR or PD or PR  sCR or CR or VGPR | 9  36 | 0.28  [0.16-0.49] | <0.0001b | 0.11  [0.04-0.28] | <0.0001b | 17  66 | 0.43  [0.23-0.80] | 0.0054b | 0.35  [0.12-0.99] | 0.0509 |
| Treatment schedule  CTD  Other | 21  16 | 1.47  [0.89-2.42] | 0.1118 | 0.96  [0.48-1.92] | 0.9140 | 66  25 | 1.55  [0.85-2.82] | 0.1419 | 1.36  [0.74-2.50] | 0.3036 |
| High cytogenetic risk  No  Yes | 24  8 | 2.25  [1.10-4.61] | 0.0044b | 2.82  [1.31-6.06] | 0.0082b | 66  17 | 1.98  [0.89-4.42] | 0.0483b | 1.61  [0.72-3.59] | 0.2463 |
| Bone lesions on X-ray  None  Present | 21  17 | 1.46  [0.85-2.52] | 0.1927 | 1.66  [0.60-4.56] | 0.3278 | NR  32 | 2.56  [1.33-4.94] | 0.0232b | 1.23  [0.31-4.80] | 0.7650 |
| Plasmocytes in bone marrow [%]  <25  ≥ 25 | 11  3 | 1.99  [1.19-3.33] | 0.0041b | 1.92  [0.90-4.10] | <0.0001b | NR  28 | 1.99  [1.08-3.66] | 0.0233b | 1.59  [0.57-4.40] | 0.0002b |

b- statistically significant result

c -Variables to which HR refers have been underline

Abbreviations: CR, complete response; CTD, cyclophosphamide, thalidomide, dexamethasone; Dkk-1, dickkopf-related protein 1; FLC, free light chains; GDF-15, growth differentiation factor 15; Hgb, hemoglobin; ISS, International Staging System; LDH, lactate dehydrogenase; Me, median; mo, month; MPV, melphalan, prednisone, bortezomib; NR, not reached; PAD, bortezomib, doxorubicin, dexamethasone; PD, progressive disease; PR, partial response; sCR, stringent complete response; VCD, bortezomib, cyclophosphamide, dexamethasone; VGPR, very good partial response; VTD, bortezomib, thalidomide, dexamethasone; β-CTX, β-C-terminal telopeptid; β2-M, beta2-microglobulin.
