# Supplementary material
Source: Research Square preprint supplement (doi:10.21203/rs.3.rs-8388907/v1)
Supplement: Supplementary file 2 [file e1550afd94025abe6187559f.docx]

**Supplementary Table S1.** Comparison of the concentration of bone metabolism regulatory biomarkers in the study group and control.

| Variable | Control [n=25] | Study group [n=76] | *p* |
| --- | --- | --- | --- |
| Me [IQR]  (min-max) | Me [IQR]  (min-max) |
| Activin A [pg/ml] | 437.50 [393.70-498.50]  (140.3-634.8) | 482.60 [408.75-620.20]  (293.3-2614.4) | 0.0260b |
| Dkk-1 [pg/ml] | 2168.00 [1775-2465]  (1356-5006) | 2954.25 [2041.65-4884.20]  (1286.3-26122.4) | 0.0001b |
| GDF-15 [pg/ml] | 721.40 [490-1113]  (313.2-2025.0) | 1711.95 [1075.15-3619.65]  (264.2-7908.6) | <0.0001b |
| β-CTX [ng/ml] | 0.35 [0.25-0.43]  (0.1-0.6) | 0.61 [0.40-0.99]  (0.1-5.0) | <0.0001b |
| Sclerostin [ng/ml] | 0.68 [0.52-0.86]  (0.4-1.1) | 0.64 [0.49-0.88]  (0.3-2.1) | 0.7800 |

b- statistically significant result

Abbreviations: β-CTX: β-C-terminal telopeptide, Dkk-1: dickkopf-related protein 1, GDF-15: growth differentiation factor 15, IQR: interquartile range, Me: median


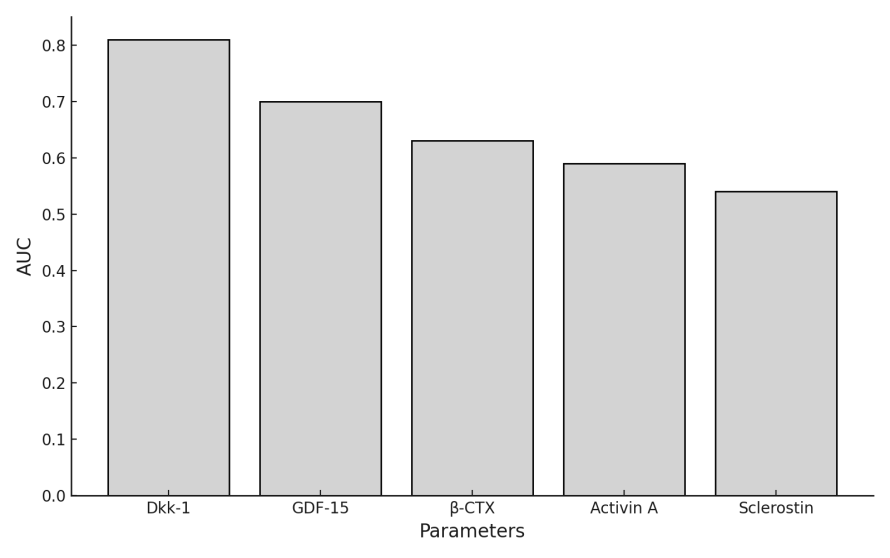


**Supplementary Figure S1.** Comparison of the AUC values describing the diagnostic usefulness of the studied indicators of metabolic regulation and bone turnover in the detection of bone lesions in patients with PCM. Abbreviations: AUC: area under curve, β-CTX: β-C-terminal telopeptide, Dkk-1: dickkopf-related protein 1, GDF-15: growth differentiation factor 15

**Supplementary Table S2.** Assessment of the diagnostic usefulness of indicators of bone metabolism regulation and the resorption marker (β-CTX) in detecting bone lesions in PCM patients.

| Parameter | Cut off | Sensitivity [%] | Specificity [%] | AUC | 95% CI | *p* |
| --- | --- | --- | --- | --- | --- | --- |
| Activin A [pg/ml] | >426 | 76.8 | 50 | 0.59 | 0.47 to 0.70 | 0.2300 |
| Dkk-1 [pg/ml] | >2046 | 87.5 | 65 | 0.81 | 0.71 to 0.89 | <0.0001b |
| GDF-15 [pg/ml] | >2359.6 | 48.2 | 95 | 0.70 | 0.59 to 0.80 | 0.0007b |
| β-CTX [ng/ml] | >0.572 | 62.5 | 65 | 0.63 | 0.52 to 0.74 | 0.0448b |
| Sclerostin [ng/ml] | ≤0.489 | 37.1 | 93.7 | 0.54 | 0.39 to 0.68 | 0.6260 |

b- statistically significant result Abbreviations: AUC: area under curve, β-CTX: β-C-terminal telopeptide, CI: confidence interval Dkk-1: dickkopf-related protein 1, GDF-15: growth differentiation factor 15, SE: standard error,

The combination of selected indicators of metabolism regulation and bone turnover in the detection of bone lesions also show high diagnostic utility, namely the combinations of activin A and Dkk-1 (AUC=0.82; 95% CI: 0.71 to 0.9), activin A, Dkk-1 and GDF-15 (AUC=0.84; 95% CI: 0.74 to 0.92), activin A, Dkk-1, GDF-15 and β-CTX (AUC=0.84; 95% CI: 0.74 to 0.92), activin A, Dkk-1, GDF-15, β-CTX and sclerostin (AUC=0.83; 95% CI: 0.7 to 0.92), activin A, β-CTX and Dkk-1 (AUC=0.82; 95% CI:0.71 to 0.9), activin A, sclerostin and Dkk-1 (AUC=0.81; 95% CI: 0.68 to 0.91), activin A, sclerostin, Dkk-1 and GDF-15 (AUC=0.83; 95% CI: 0.70 to 0.92), Dkk-1 and sclerostin (AUC=0.81; 95% CI: 0.68 to 0.91), as well as β-CTX, sclerostin, activin A and Dkk-1 (AUC=0.81; 95% CI: 0.68 to 0.91) (Supplementary Table S3).

**Supplementary Table S3.** Assessment of the diagnostic usefulness of the combined determination of indicators of metabolic regulation and bone turnover in the detection of bone lesions in patients with PCM.

| Examined parameters | AUC | 95% CI |
| --- | --- | --- |
| Activin A, Dkk-1  Activin A, Dkk-1, GDF-15  Activin A, Dkk-1, GDF-15, β-CTX  Activin A, Dkk-1, GDF-15, β-CTX, Sclerostin | 0.82  0.84  0.84  0.83 | 0.71-0.90  0.74-0.92  0.74-0.92  0.70-0.92 |
| Activin A, GDF-15  Activin A, GDF-15, Dkk-1  Activin A, GDF-15, Dkk-1, β-CTX  Activin A, GDF-15, Dkk-1, β-CTX, Sclerostin | 0.70  0.84  0.84  0.83 | 0.59-0.80 0.74-0.92 0.74-0.92  0.70-0.92 |
| Activin A, β-CTX  Activin A, β-CTX, Dkk-1  Activin A, β-CTX, Dkk-1, GDF-15  Activin A, β-CTX, Dkk-1, GDF-15, Sclerostin | 0.64  0.82  0.84  0.83 | 0.52-0.74 0.71-0.90  0.74-0.92  0.70-0.92 |
| Activin A, Sclerostin  Activin A, Sclerostin , Dkk-1  Activin A, Sclerostin, Dkk-1, GDF-15  Activin A, Sclerostin, Dkk-1, GDF-15, β-CTX | 0.55  0.81  0.83  0.83 | 0.41-0.69 0.68-0.91  0.70-0.92  0.70-0.92 |
| Dkk-1, GDF-15  Dkk-1, GDF-15, Activin A  Dkk-1, GDF-15, Activin A, β-CTX  Dkk-1, GDF-15, Activin A, β-CTX, Sclerostin | 0.85  0.84  0.84  0.83 | 0.75-0.92 0.74-0.92 0.74-0.92  0.70-0.92 |
| Dkk-1, β-CTX  Dkk-1, β-CTX, Activin A  Dkk-1, β-CTX, Activin A, GDF-15  Dkk-1, β-CTX, Activin A, GDF-15, Sclerostin | 0.82  0.82  0.84  0.83 | 0.71-0.90 0.71-0.90 0.74-0.92  0.70-0.92 |
| Dkk-1, Sclerostin  Dkk-1, Sclerostin, Activin A  Dkk-1, Sclerostin, Activin A, GDF-15  Dkk-1, Sclerostin, Activin A, GDF-15, β-CTX | 0.81  0.81  0.83  0.83 | 0.68-0.91 0.68-0.91  0.70-0.92  0.70-0.92 |
| GDF-15, β-CTX  GDF-15, β-CTX, Activin A  GDF-15, β-CTX, Activin A, Dkk-1  GDF-15, β-CTX, Activin A, Dkk-1, Sclerostin | 0.72  0.72  0.84  0.83 | 0.60-0.81  0.60-0.81 0.74-0.92  0.70-0.92 |
| GDF-15, Sclerostin  GDF-15, Sclerostin, Activin A  GDF-15, Sclerostin , Activin A, Dkk-1  GDF-15, Sclerostin Activin A, Dkk-1, β-CTX | 0.73  0.74  0.83  0.83 | 0.59-0.85  0.60-0.86  0.70-0.92  0.70-0.92 |
| β-CTX, Sclerostin  β-CTX, Sclerostin , Activin A  β-CTX, Sclerostin, Activin A, Dkk-1  β-CTX, Sclerostin, Activin A, Dkk-1, GDF-15 | 0.68  0.68  0.81  0.83 | 0.53-0.80  0.53-0.80 0.68-0.91  0.70-0.92 |

Abbreviations: AUC: area under curve, β-CTX: β-C-terminal telopeptide, CI: confidence interval Dkk-1: dickkopf-related protein 1, GDF-15: growth differentiation factor 15,

**Supplementary Table S4.** Comparison of concentrations of parameters regulating bone metabolism and markers of bone turnover in patients with PCM before and after treatment.

| Parameter | Before treatment | After treatment | *p* |
| --- | --- | --- | --- |
| Me [IQR]  (min-max) | Me [IQR]  (min-max) |
| Activin A [pg/ml] | 472.00  [390.70-605.30]  (293.3-1281.4) | 434.90  [356.50-495.80]  (291.6- 906.3) | 0.1500 |
| Dkk-1 [pg/ml] | 2840.70  [2394.56-3377.10]  (1286.3-26122.4) | 1679.30  [1611.97-2526.16]  (1164-3810.1) | 0.0002b |
| GDF-15 [pg/ml] | 1325.50  [1011.10-1734.90]  (598.9-7228.2) | 1581.30  [945.30-2691.60]  (664.2-4729.9) | 0.2528 |
| β-CTX [ng/ml] | 0.60  [0.36-0.73]  (0.1-2.8) | 0.10  [0.11-0.22]  (0.1-0.9) | 0.0002b |
| Sclerostin [ng/ml] | 0.70  [0.45-0.82]  (0.3-1.5) | 0.50  [0.35-0.56]  (0.3-1.1) | 0.0103b |

b- statistically significant result Abbreviations: β-CTX: β-C-terminal telopeptide, Dkk-1: dickkopf-related protein 1, GDF-15: growth differentiation factor 15, IQR: interquartile range, Me: median
